# Supplementary material for: Clerodendrum chinense Stem Extract and Nanoparticles: Effects on Proliferation, Colony Formation, Apoptosis Induction, Cell Cycle Arrest, and Mitochondrial Membrane Potential in Human Breast Adenocarcinoma Breast Cancer Cells
Source: MDPI journal article supplement (doi:10.3390/ijms25020978), 2024-01-12
Supplement: s1 [file s1]

**Supplementary data of a manuscript entitled *Clerodendrum chinense* Stem Extract and Nanoparticles: Effects on Proliferation, Colony Formation, Apoptosis Induction, Cell Cycle Arrest, and MMP in MCF-7 Breast Cancer Cells**

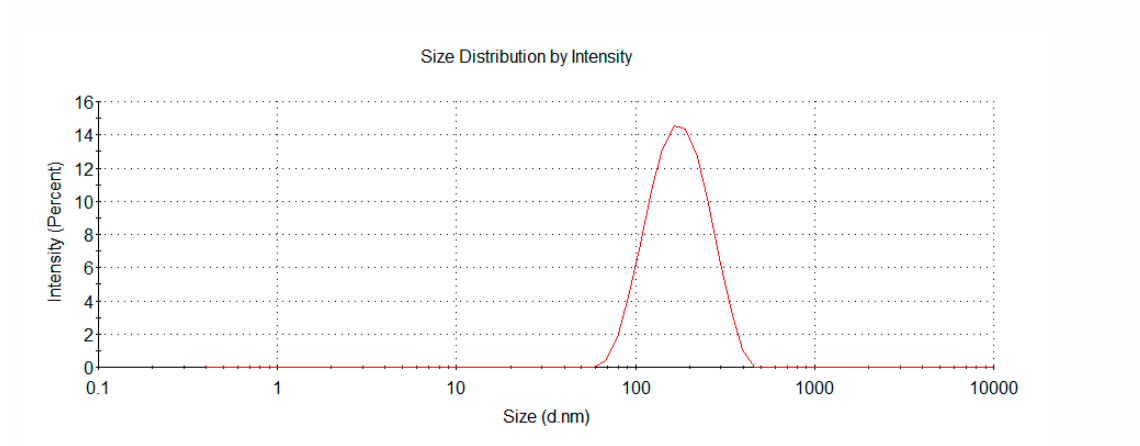

**Supplementary Figure S1** Particle size distribution analysis of *C. chinense* stem extract

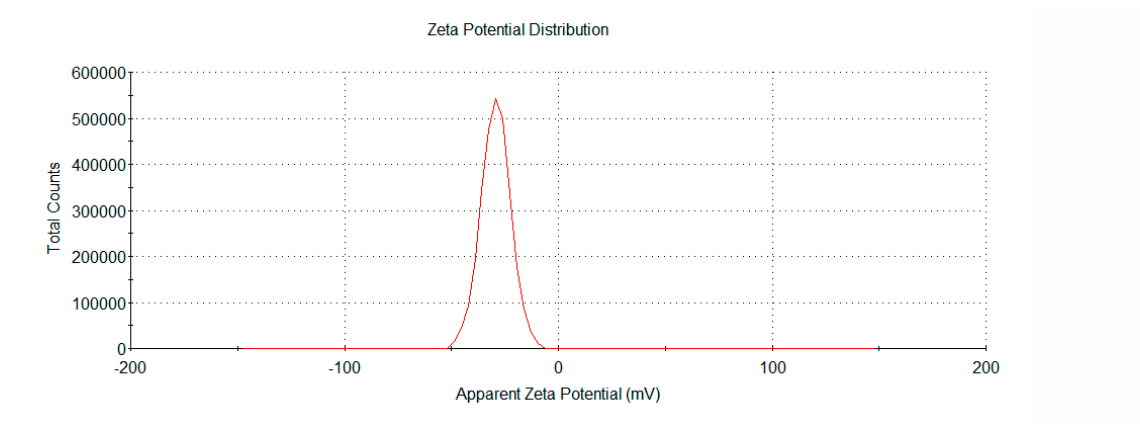

**Supplementary Figure S2** Zeta potential analysis of *C. chinense* stem extract

**A**

|                                | Size (d.nm):         | % Intensity: | St Dev (d.nm): |
|--------------------------------|----------------------|--------------|----------------|
| <b>Z-Average (d.nm):</b> 190.3 | <b>Peak 1:</b> 223.4 | 100.0        | 82.33          |
| <b>Pdl:</b> 0.136              | <b>Peak 2:</b> 0.000 | 0.0          | 0.000          |
| <b>Intercept:</b> 0.918        | <b>Peak 3:</b> 0.000 | 0.0          | 0.000          |
| <b>Result quality : Good</b>   |                      |              |                |

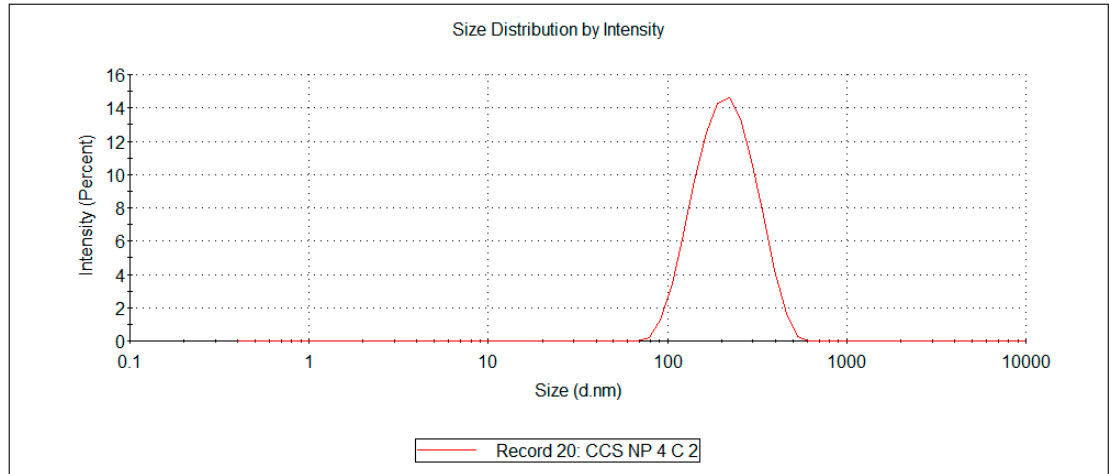**B**

|                                     | Mean (mV)            | Area (%) | St Dev (mV) |
|-------------------------------------|----------------------|----------|-------------|
| <b>Zeta Potential (mV):</b> -24.9   | <b>Peak 1:</b> -24.9 | 100.0    | 3.23        |
| <b>Zeta Deviation (mV):</b> 3.23    | <b>Peak 2:</b> 0.00  | 0.0      | 0.00        |
| <b>Conductivity (mS/cm):</b> 0.0514 | <b>Peak 3:</b> 0.00  | 0.0      | 0.00        |
| <b>Result quality : Good</b>        |                      |          |             |

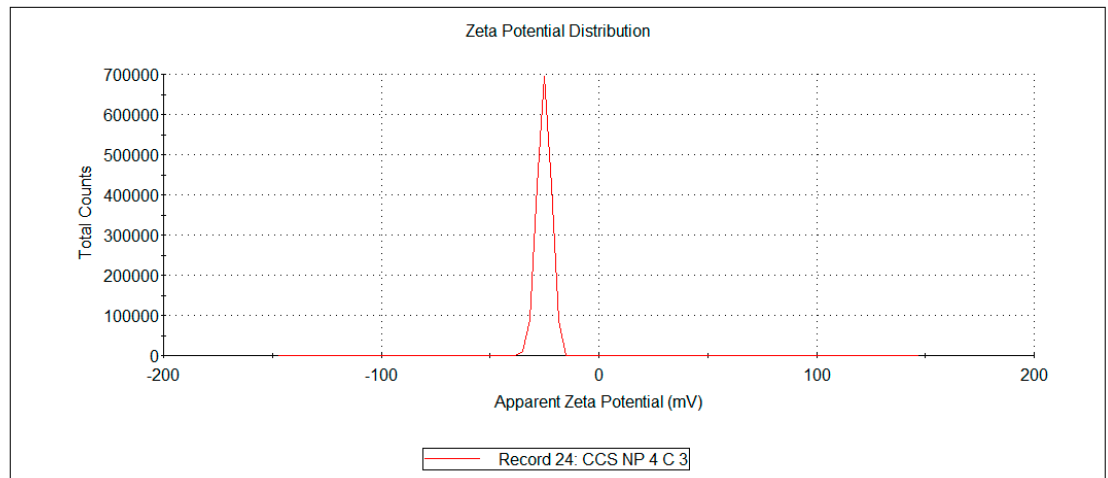

**C**

|                                | Size (d.nm):         | % Intensity: | St Dev (d.nm): |
|--------------------------------|----------------------|--------------|----------------|
| <b>Z-Average (d.nm):</b> 170.5 | <b>Peak 1:</b> 203.7 | 100.0        | 92.46          |
| <b>Pdl:</b> 0.152              | <b>Peak 2:</b> 0.000 | 0.0          | 0.000          |
| <b>Intercept:</b> 0.910        | <b>Peak 3:</b> 0.000 | 0.0          | 0.000          |
| <b>Result quality : Good</b>   |                      |              |                |

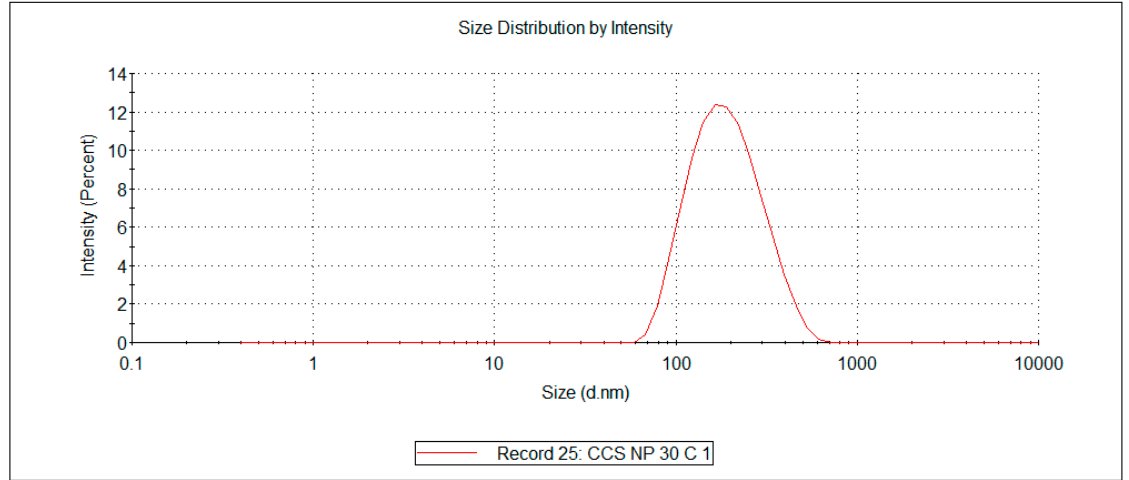

**D**

|                                     | Mean (mV)            | Area (%) | St Dev (mV) |
|-------------------------------------|----------------------|----------|-------------|
| <b>Zeta Potential (mV):</b> -31.6   | <b>Peak 1:</b> -31.6 | 100.0    | 7.07        |
| <b>Zeta Deviation (mV):</b> 7.07    | <b>Peak 2:</b> 0.00  | 0.0      | 0.00        |
| <b>Conductivity (mS/cm):</b> 0.0476 | <b>Peak 3:</b> 0.00  | 0.0      | 0.00        |
| <b>Result quality : Good</b>        |                      |          |             |

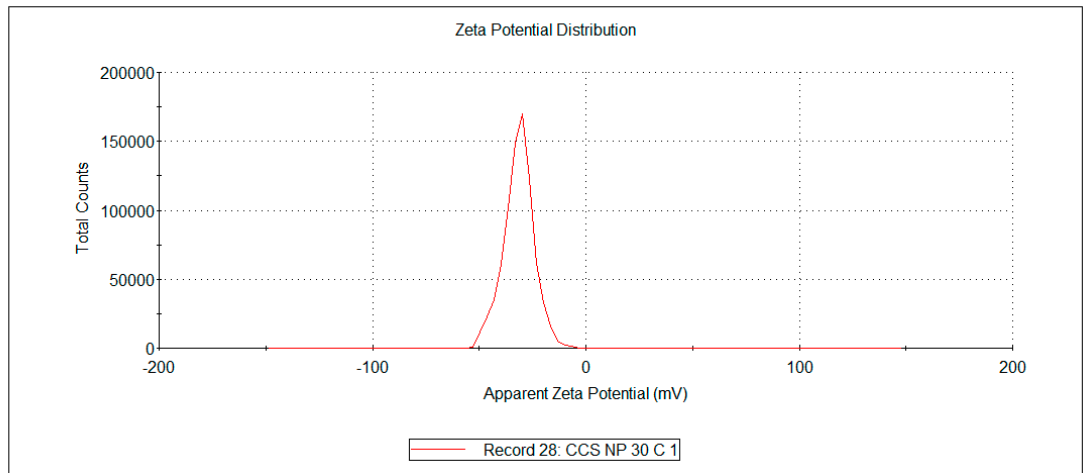

**E**

|                                | Size (d.nm):         | % Intensity: | St Dev (d.nm): |
|--------------------------------|----------------------|--------------|----------------|
| <b>Z-Average (d.nm):</b> 151.7 | <b>Peak 1:</b> 164.7 | 100.0        | 48.63          |
| <b>Pdl:</b> 0.071              | <b>Peak 2:</b> 0.000 | 0.0          | 0.000          |
| <b>Intercept:</b> 0.930        | <b>Peak 3:</b> 0.000 | 0.0          | 0.000          |
| <b>Result quality :</b> Good   |                      |              |                |

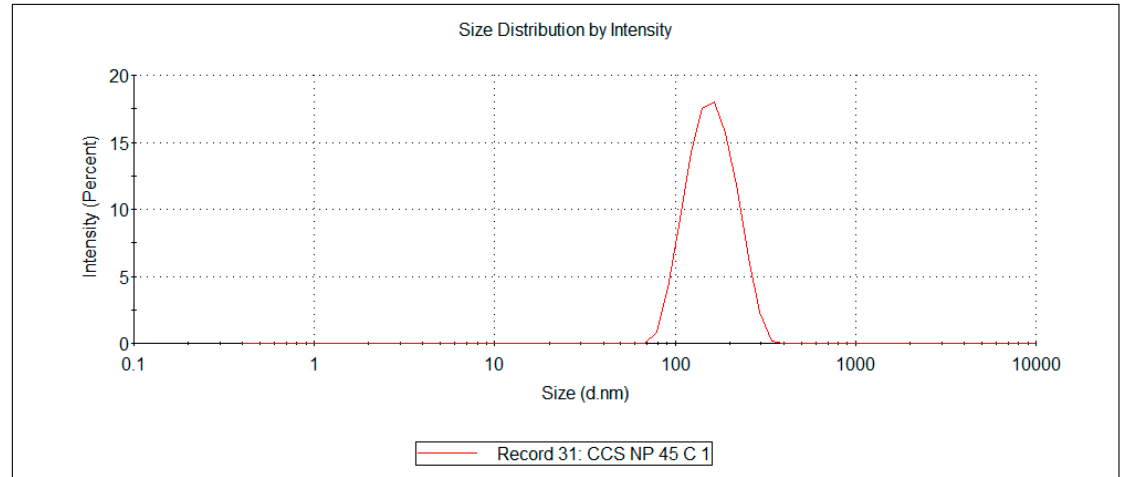**F**

|                                     | Mean (mV)            | Area (%) | St Dev (mV) |
|-------------------------------------|----------------------|----------|-------------|
| <b>Zeta Potential (mV):</b> -27.6   | <b>Peak 1:</b> -27.6 | 100.0    | 7.68        |
| <b>Zeta Deviation (mV):</b> 7.68    | <b>Peak 2:</b> 0.00  | 0.0      | 0.00        |
| <b>Conductivity (mS/cm):</b> 0.0655 | <b>Peak 3:</b> 0.00  | 0.0      | 0.00        |
| <b>Result quality :</b> Good        |                      |          |             |

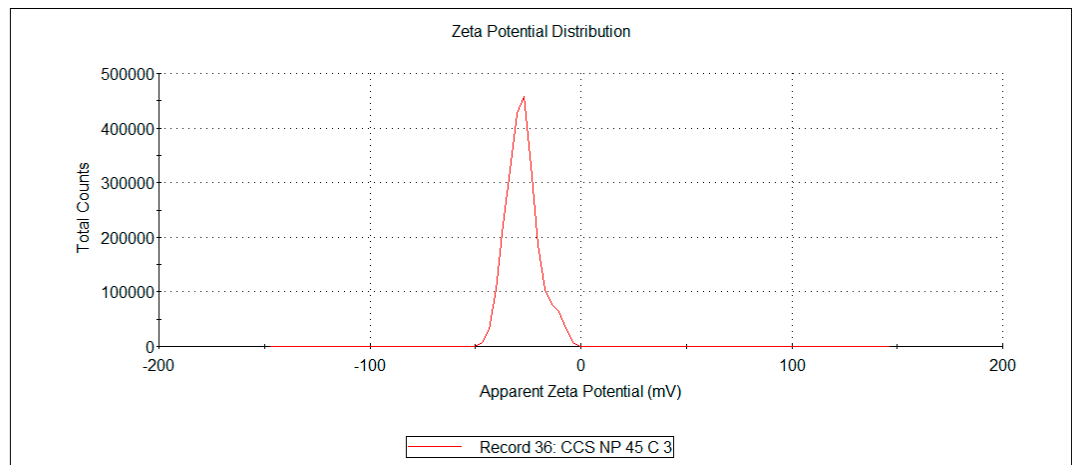

**Supplementary Figure S3** Size of *C. chinense* stem extract NPs stored at (A) 4, (B) 30, and (C) 45 °C for 4 months and zeta potential values of *C. chinense* stem extract NPs stored at (D) 4, (E) 30, and (F) 45 °C for 4 months.

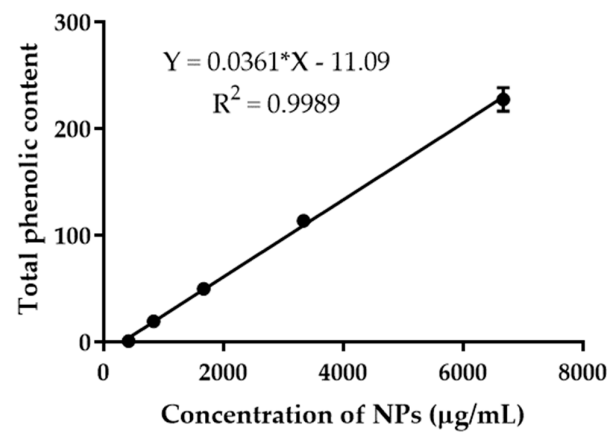

**Supplementary Figure S4** Plots of total phenolic contents and *C. chinense* stem extract concentrations

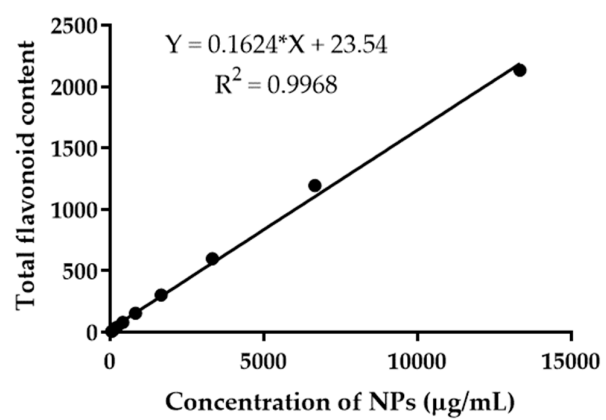

**Supplementary Figure S5** Plots of total flavonoid contents and *C. chinense* stem extract concentrations

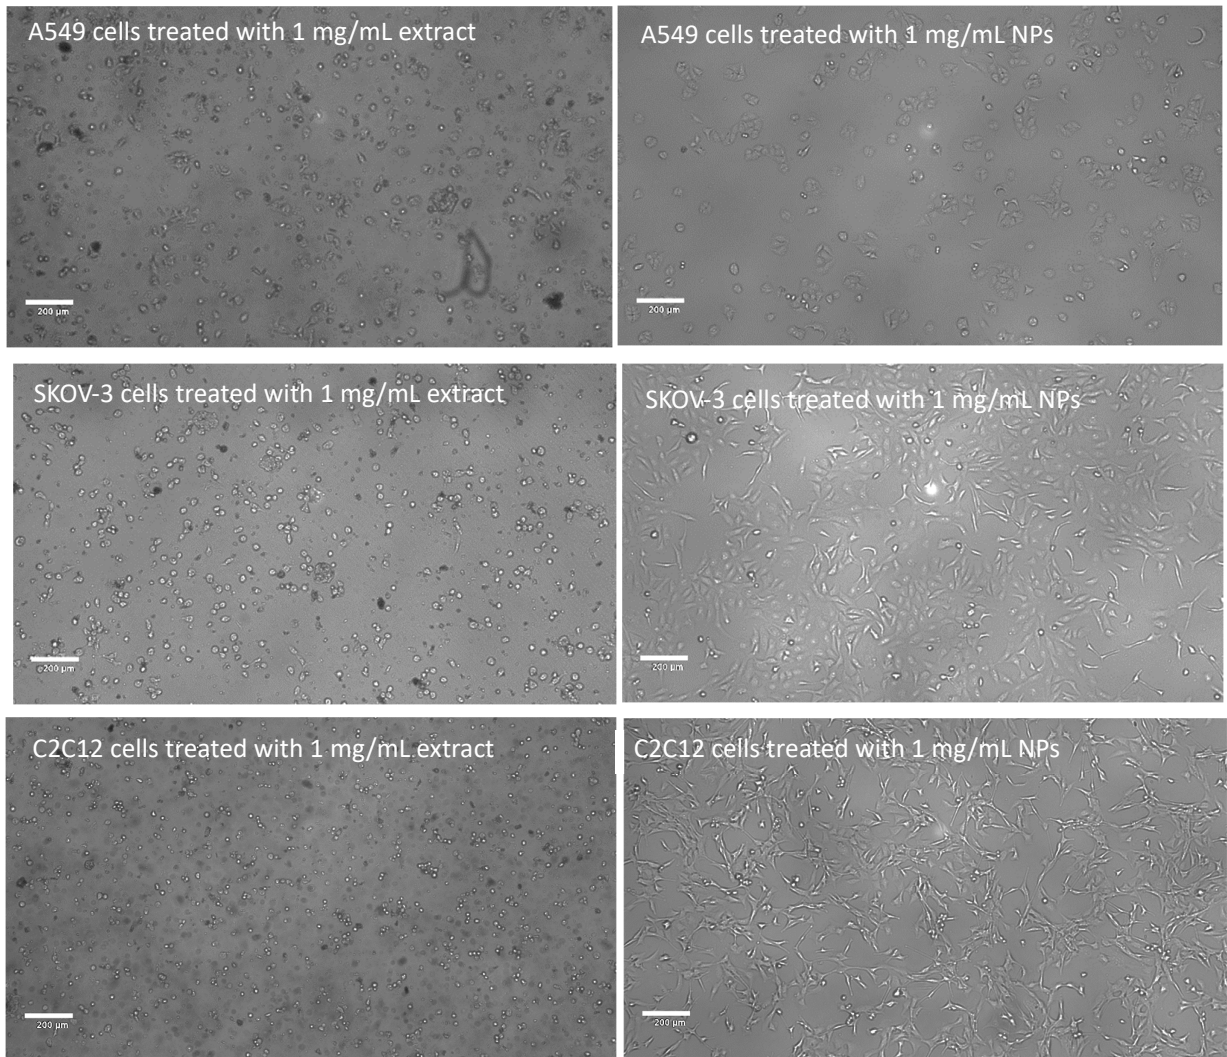

**Supplementary Figure S6** Micrographs of cells treated with *C. chinense* stem extract or NPs at 1 mg/mL for 24 h.



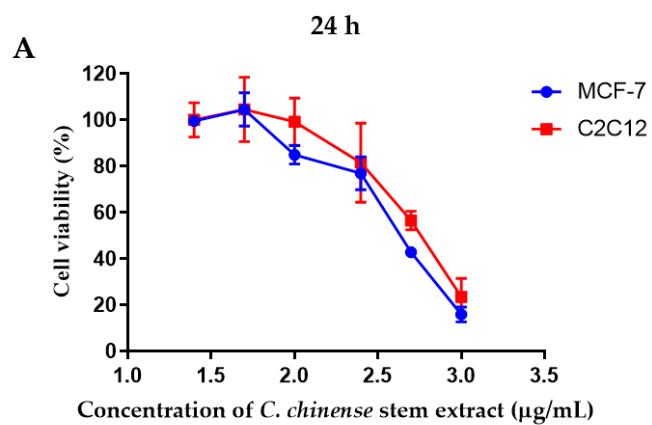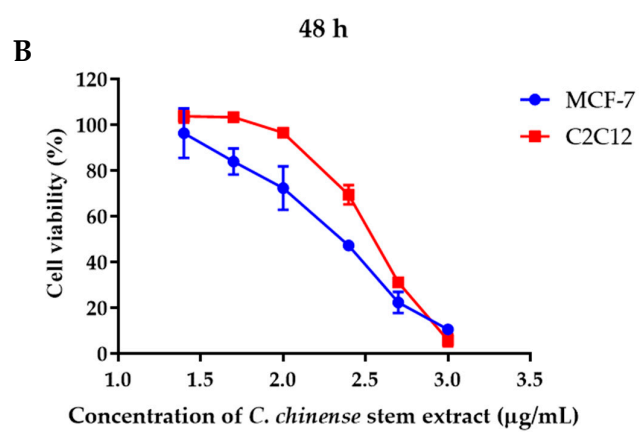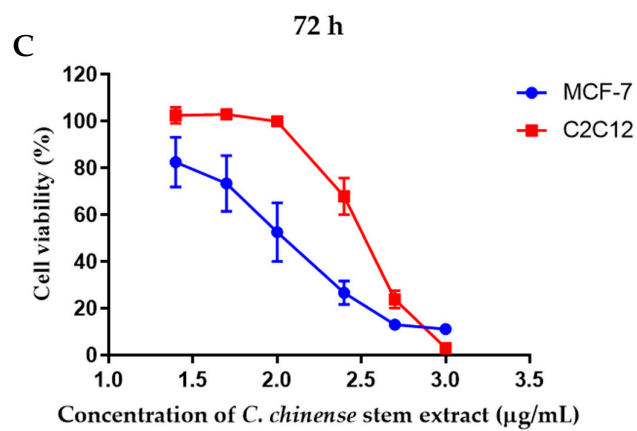

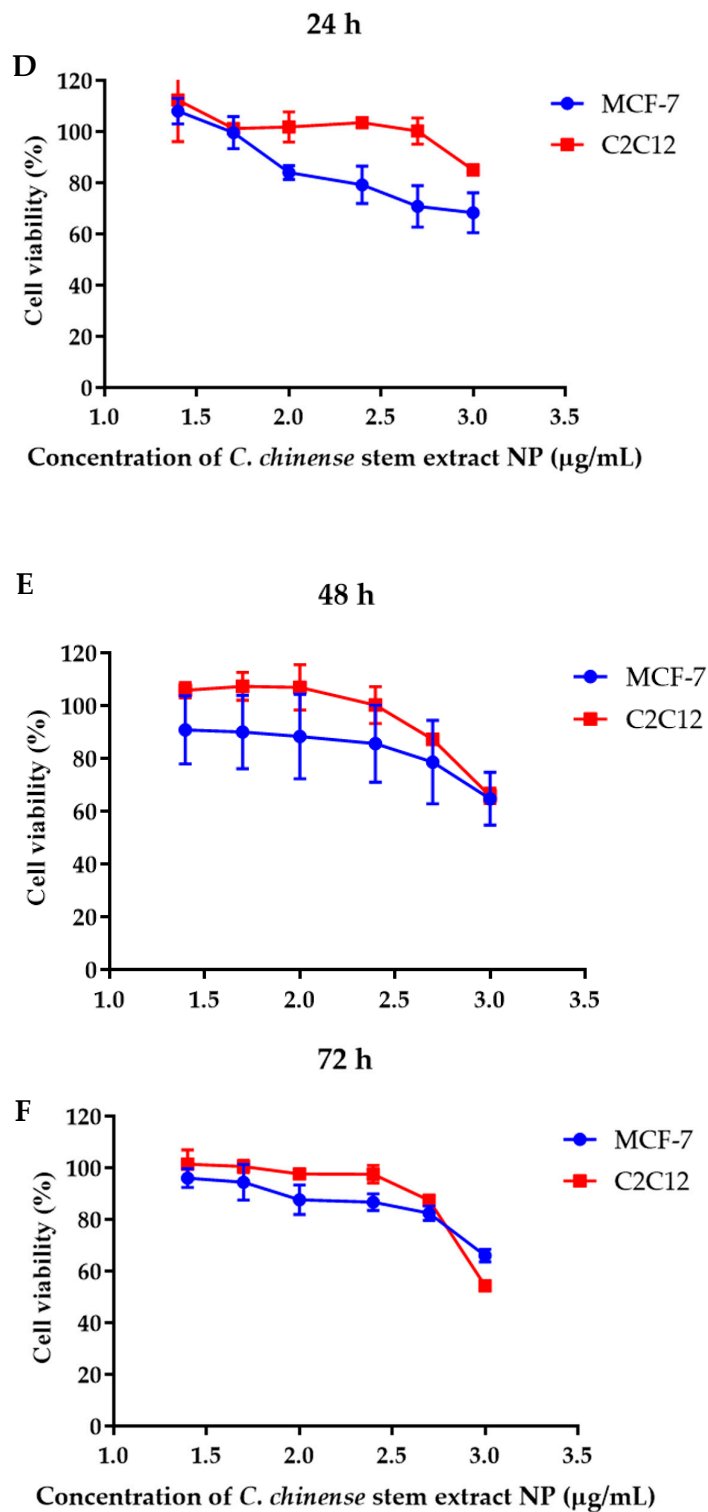

**Supplementary Figure S7** Cell viability and growth of MCF-7 breast cancer cells and C2C12 myoblast cells after treatment with *C. chinense* stem extract for (A) 24 h, (B) 48 h, (C) 72 h and the NPs for (D) 24 h, (E) 48 h, and (F) 72 h. Data were presented as the mean  $\pm$  SD of the three independent experiments.

**Supplementary Table S1** Tukey's multiple comparisons test for particle size statistical analysis

| 4 °C      | Mean Diff. | 95.00% CI of diff. | Significant? | Summary | Adjusted P Value |
|-----------|------------|--------------------|--------------|---------|------------------|
| 0 vs. 0.5 | -38.73     | -46.14 to -31.32   | Yes          | ****    | <0.0001          |
| 0 vs. 1   | -27.43     | -34.84 to -20.02   | Yes          | ****    | <0.0001          |
| 0 vs. 2   | -18.17     | -25.58 to -10.76   | Yes          | ****    | <0.0001          |
| 0 vs. 3   | -19.73     | -27.14 to -12.32   | Yes          | ****    | <0.0001          |
| 0 vs. 4   | -30.27     | -37.68 to -22.86   | Yes          | ****    | <0.0001          |

| 30 °C     | Mean Diff. | 95.00% CI of diff. | Significant? | Summary | Adjusted P Value |
|-----------|------------|--------------------|--------------|---------|------------------|
| 0 vs. 0.5 | -6.067     | -13.48 to 1.342    | No           | ns      | 0.1622           |
| 0 vs. 1   | -8.567     | -15.98 to -1.158   | Yes          | *       | 0.0156           |
| 0 vs. 2   | -2.233     | -9.642 to 5.175    | No           | ns      | 0.9422           |
| 0 vs. 3   | -3.067     | -10.48 to 4.342    | No           | ns      | 0.8116           |
| 0 vs. 4   | -7.467     | -14.88 to -0.05813 | Yes          | *       | 0.0473           |

| 45 °C     | Mean Diff. | 95.00% CI of diff. | Significant? | Summary | Adjusted P Value |
|-----------|------------|--------------------|--------------|---------|------------------|
| 0 vs. 0.5 | -33.07     | -40.48 to -25.66   | Yes          | ****    | <0.0001          |
| 0 vs. 1   | -16        | -23.41 to -8.591   | Yes          | ****    | <0.0001          |
| 0 vs. 2   | 2.933      | -4.475 to 10.34    | No           | ns      | 0.8381           |
| 0 vs. 3   | -3.833     | -11.24 to 3.575    | No           | ns      | 0.6311           |
| 0 vs. 4   | 11.17      | 3.758 to 18.58     | Yes          | ***     | 0.0008           |

**Supplementary Table S2** Tukey's multiple comparisons test for polydispersity index statistical analysis

| 4 °C      | Mean Diff. | 95.00% CI of diff.   | Significant? | Summary | Adjusted P Value |
|-----------|------------|----------------------|--------------|---------|------------------|
| 0 vs. 0.5 | -0.1527    | -0.2121 to -0.09325  | Yes          | ****    | <0.0001          |
| 0 vs. 1   | -0.1117    | -0.1711 to -0.05225  | Yes          | ****    | <0.0001          |
| 0 vs. 2   | -0.064     | -0.1234 to -0.004584 | Yes          | *       | 0.0285           |
| 0 vs. 3   | -0.066     | -0.1254 to -0.006584 | Yes          | *       | 0.0221           |
| 0 vs. 4   | -0.098     | -0.1574 to -0.03858  | Yes          | ***     | 0.0002           |

| 30 °C     | Mean Diff. | 95.00% CI of diff.   | Significant? | Summary | Adjusted P Value |
|-----------|------------|----------------------|--------------|---------|------------------|
| 0 vs. 0.5 | -0.053     | -0.1124 to 0.006416  | No           | ns      | 0.1036           |
| 0 vs. 1   | -0.048     | -0.1074 to 0.01142   | No           | ns      | 0.1729           |
| 0 vs. 2   | -0.026     | -0.08542 to 0.03342  | No           | ns      | 0.7741           |
| 0 vs. 3   | -0.06467   | -0.1241 to -0.00525  | Yes          | *       | 0.0262           |
| 0 vs. 4   | -0.06533   | -0.1247 to -0.005917 | Yes          | *       | 0.0241           |

| 45 °C     | Mean Diff. | 95.00% CI of diff.  | Significant? | Summary | Adjusted P Value |
|-----------|------------|---------------------|--------------|---------|------------------|
| 0 vs. 0.5 | -0.102     | -0.1614 to -0.04258 | Yes          | ***     | 0.0001           |
| 0 vs. 1   | -0.08767   | -0.1471 to -0.02825 | Yes          | **      | 0.0011           |
| 0 vs. 2   | -0.01833   | -0.07775 to 0.04108 | No           | ns      | 0.9365           |
| 0 vs. 3   | -0.014     | -0.07342 to 0.04542 | No           | ns      | 0.9797           |
| 0 vs. 4   | 0.003334   | -0.05608 to 0.06275 | No           | ns      | >0.9999          |

**Supplementary Table S3** Tukey's multiple comparisons test for zeta potential statistical analysis

| 4 °C      | Mean Diff. | 95.00% CI of diff. | Significant? | Summary | Adjusted P Value |
|-----------|------------|--------------------|--------------|---------|------------------|
| 0 vs. 0.5 | 1.2        | -2.18 to 4.58      | No           | ns      | 0.8907           |
| 0 vs. 1   | -3.167     | -6.547 to 0.2132   | No           | ns      | 0.0772           |
| 0 vs. 2   | -3.367     | -6.747 to 0.01323  | No           | ns      | 0.0514           |
| 0 vs. 3   | -3.333     | -6.713 to 0.04653  | No           | ns      | 0.0551           |
| 0 vs. 4   | -3.167     | -6.547 to 0.2132   | No           | ns      | 0.0772           |

| 30 °C     | Mean Diff. | 95.00% CI of diff. | Significant? | Summary | Adjusted P Value |
|-----------|------------|--------------------|--------------|---------|------------------|
| 0 vs. 0.5 | 1.267      | -2.113 to 4.647    | No           | ns      | 0.8667           |
| 0 vs. 1   | 0.3666     | -3.013 to 3.747    | No           | ns      | 0.9995           |
| 0 vs. 2   | -0.7       | -4.08 to 2.68      | No           | ns      | 0.9886           |
| 0 vs. 3   | 1.367      | -2.013 to 4.747    | No           | ns      | 0.826            |
| 0 vs. 4   | 1.867      | -1.513 to 5.247    | No           | ns      | 0.5649           |

| 45 °C     | Mean Diff. | 95.00% CI of diff. | Significant? | Summary | Adjusted P Value |
|-----------|------------|--------------------|--------------|---------|------------------|
| 0 vs. 0.5 | 4.167      | 0.7867 to 7.547    | Yes          | **      | 0.0085           |
| 0 vs. 1   | 0.9666     | -2.413 to 4.347    | No           | ns      | 0.9534           |
| 0 vs. 2   | -2.567     | -5.947 to 0.8132   | No           | ns      | 0.2266           |
| 0 vs. 3   | -1.233     | -4.613 to 2.147    | No           | ns      | 0.879            |
| 0 vs. 4   | -0.7334    | -4.113 to 2.647    | No           | ns      | 0.9859           |

**Supplementary Table S4** Tukey's multiple comparisons test for colony formation percentage statistical analysis

| CCS       | Mean Diff. | 95.00% CI of diff. | Significant? | Summary | Adjusted P Value |
|-----------|------------|--------------------|--------------|---------|------------------|
| 0 vs. 25  | 5.95       | -6.945 to 18.84    | No           | ns      | 0.7111           |
| 0 vs. 50  | 9.09       | -3.805 to 21.98    | No           | ns      | 0.2832           |
| 0 vs. 100 | 45.98      | 33.09 to 58.87     | Yes          | ****    | <0.0001          |
| 0 vs. 250 | 78.67      | 65.78 to 91.56     | Yes          | ****    | <0.0001          |
| 0 vs. 500 | 98.6       | 85.71 to 111.5     | Yes          | ****    | <0.0001          |

| CCS NP    | Mean Diff. | 95.00% CI of diff. | Significant? | Summary | Adjusted P Value |
|-----------|------------|--------------------|--------------|---------|------------------|
| 0 vs. 25  | 19.19      | 6.295 to 32.08     | Yes          | **      | 0.0014           |
| 0 vs. 50  | 25.19      | 12.3 to 38.08      | Yes          | ****    | <0.0001          |
| 0 vs. 100 | 86.24      | 73.35 to 99.13     | Yes          | ****    | <0.0001          |
| 0 vs. 250 | 100        | 87.11 to 112.9     | Yes          | ****    | <0.0001          |
| 0 vs. 500 | 100        | 87.11 to 112.9     | Yes          | ****    | <0.0001          |

**Supplementary Table 5** Tukey's multiple comparisons test for apoptosis statistical analysis*C. chinense* leaf extract

| Live      | Mean Diff. | 95.00% CI of diff. | Significant? | Summary | Adjusted P Value |
|-----------|------------|--------------------|--------------|---------|------------------|
| 0 vs. 100 | 40.87      | 34.43 to 47.31     | Yes          | ****    | <0.0001          |
| 0 vs. 250 | 36.33      | 29.89 to 42.77     | Yes          | ****    | <0.0001          |
| 0 vs. 500 | 77.17      | 70.73 to 83.61     | Yes          | ****    | <0.0001          |

| late apoptosis | Mean Diff. | 95.00% CI of diff. | Significant? | Summary | Adjusted P Value |
|----------------|------------|--------------------|--------------|---------|------------------|
| 0 vs. 100      | -10.8      | -17.24 to -4.357   | Yes          | ***     | 0.0001           |
| 0 vs. 250      | -11.5      | -17.94 to -5.057   | Yes          | ****    | <0.0001          |
| 0 vs. 500      | -8.86      | -15.3 to -2.417    | Yes          | **      | 0.002            |

| Necrosis  | Mean Diff. | 95.00% CI of diff. | Significant? | Summary | Adjusted P Value |
|-----------|------------|--------------------|--------------|---------|------------------|
| 0 vs. 100 | -29.13     | -35.57 to -22.69   | Yes          | ****    | <0.0001          |
| 0 vs. 250 | -25        | -31.44 to -18.56   | Yes          | ****    | <0.0001          |
| 0 vs. 500 | -69.36     | -75.8 to -62.92    | Yes          | ****    | <0.0001          |

*C. chinense* leaf extract NPs

| Live       | Mean Diff. | 95.00% CI of diff. | Significant? | Summary | Adjusted P Value |
|------------|------------|--------------------|--------------|---------|------------------|
| 0 vs. 250  | 53.73      | 47.29 to 60.17     | Yes          | ****    | <0.0001          |
| 0 vs. 500  | 79.03      | 72.59 to 85.47     | Yes          | ****    | <0.0001          |
| 0 vs. 1000 | 87.2       | 80.76 to 93.64     | Yes          | ****    | <0.0001          |

| late apoptosis | Mean Diff. | 95.00% CI of diff. | Significant? | Summary | Adjusted P Value |
|----------------|------------|--------------------|--------------|---------|------------------|
| 0 vs. 250      | -23.46     | -29.9 to -17.02    | Yes          | ****    | <0.0001          |
| 0 vs. 500      | -22.3      | -28.74 to -15.86   | Yes          | ****    | <0.0001          |
| 0 vs. 1000     | -36.86     | -43.3 to -30.42    | Yes          | ****    | <0.0001          |

| Necrosis | Mean Diff. | 95.00% CI of diff. | Significant? | Summary | Adjusted P Value |
|----------|------------|--------------------|--------------|---------|------------------|
|----------|------------|--------------------|--------------|---------|------------------|

|            |        |                  |     |      |         |
|------------|--------|------------------|-----|------|---------|
| 0 vs. 250  | -30.06 | -36.5 to -23.62  | Yes | **** | <0.0001 |
| 0 vs. 500  | -57.13 | -63.57 to -50.69 | Yes | **** | <0.0001 |
| 0 vs. 1000 | -49.9  | -56.34 to -43.46 | Yes | **** | <0.0001 |

**Supplementary Table S6** Sidak's multiple comparisons test for Mitochondrial Membrane Potential (MMP) statistical analysis

JC-1 aggregates

| CCS                 | Mean Diff. | 95.00% CI of diff. | Significant? | Summary | Adjusted P Value |
|---------------------|------------|--------------------|--------------|---------|------------------|
| control agg vs. 100 | -1.36      | -11.96 to 9.241    | No           | ns      | 0.9993           |
| control agg vs. 250 | 3.8        | -6.801 to 14.4     | No           | ns      | 0.8808           |
| control agg vs. 500 | 11.2       | 0.5985 to 21.8     | Yes          | *       | 0.0353           |

| CCS NP              | Mean Diff. | 95.00% CI of diff. | Significant? | Summary | Adjusted P Value |
|---------------------|------------|--------------------|--------------|---------|------------------|
| control agg vs. 100 | 9.23       | -1.371 to 19.83    | No           | ns      | 0.1084           |
| control agg vs. 250 | 13.53      | 2.929 to 24.13     | Yes          | **      | 0.0089           |
| control agg vs. 500 | 53.13      | 42.53 to 63.73     | Yes          | ****    | <0.0001          |

JC-1 monomers

| CCS                  | Mean Diff. | 95.00% CI of diff. | Significant? | Summary | Adjusted P Value |
|----------------------|------------|--------------------|--------------|---------|------------------|
| control mono vs. 100 | 0.24       | -9.295 to 9.775    | No           | ns      | >0.9999          |
| control mono vs. 250 | -4.6       | -14.14 to 4.935    | No           | ns      | 0.6668           |
| control mono vs. 500 | -9.9       | -19.44 to -0.3649  | Yes          | *       | 0.0395           |

| CCS NP               | Mean Diff. | 95.00% CI of diff. | Significant? | Summary | Adjusted P Value |
|----------------------|------------|--------------------|--------------|---------|------------------|
| control mono vs. 100 | -9.2       | -18.74 to 0.3351   | No           | ns      | 0.0619           |
| control mono vs. 250 | -12.14     | -21.68 to -2.605   | Yes          | **      | 0.0091           |
| control mono vs. 500 | -46.87     | -56.41 to -37.33   | Yes          | ****    | <0.0001          |



**Supplementary Table S7** Tukey's multiple comparisons test for cell cycle arrest statistical analysis

*C. chinense* stem extract

| G0/G1     | Mean Diff. | 95.00% CI of diff. | Significant? | Summary | Adjusted P Value |
|-----------|------------|--------------------|--------------|---------|------------------|
| 0 vs. 100 | -1.9       | -3.149 to -0.6511  | Yes          | **      | 0.0017           |
| 0 vs. 250 | -1.94      | -3.189 to -0.6911  | Yes          | **      | 0.0014           |
| 0 vs. 500 | -6.77      | -8.019 to -5.521   | Yes          | ****    | <0.0001          |

| S         | Mean Diff. | 95.00% CI of diff. | Significant? | Summary | Adjusted P Value |
|-----------|------------|--------------------|--------------|---------|------------------|
| 0 vs. 100 | 0.6        | -0.6489 to 1.849   | No           | ns      | 0.5564           |
| 0 vs. 250 | -3.93      | -5.179 to -2.681   | Yes          | ****    | <0.0001          |
| 0 vs. 500 | -0.4       | -1.649 to 0.8489   | No           | ns      | 0.8133           |

| G2/M      | Mean Diff. | 95.00% CI of diff. | Significant? | Summary | Adjusted P Value |
|-----------|------------|--------------------|--------------|---------|------------------|
| 0 vs. 100 | 1.56       | 0.3111 to 2.809    | Yes          | *       | 0.0106           |
| 0 vs. 250 | 6.66       | 5.411 to 7.909     | Yes          | ****    | <0.0001          |
| 0 vs. 500 | 8.63       | 7.381 to 9.879     | Yes          | ****    | <0.0001          |

*C. chinense* stem extract NPs

| G0/G1     | Mean Diff. | 95.00% CI of diff. | Significant? | Summary | Adjusted P Value |
|-----------|------------|--------------------|--------------|---------|------------------|
| 0 vs. 100 | -3.54      | -4.99 to -2.09     | Yes          | ****    | <0.0001          |
| 0 vs. 250 | -11.6      | -13.05 to -10.15   | Yes          | ****    | <0.0001          |
| 0 vs. 500 | -4.84      | -6.29 to -3.39     | Yes          | ****    | <0.0001          |

| S         | Mean Diff. | 95.00% CI of diff. | Significant? | Summary | Adjusted P Value |
|-----------|------------|--------------------|--------------|---------|------------------|
| 0 vs. 100 | 3.33       | 1.88 to 4.78       | Yes          | ****    | <0.0001          |
| 0 vs. 250 | 5.43       | 3.98 to 6.88       | Yes          | ****    | <0.0001          |
| 0 vs. 500 | 3.7        | 2.25 to 5.15       | Yes          | ****    | <0.0001          |

| G2/M      | Mean Diff. | 95.00% CI of diff. | Significant? | Summary | Adjusted P Value |
|-----------|------------|--------------------|--------------|---------|------------------|
| 0 vs. 100 | 2.6        | 1.15 to 4.05       | Yes          | ***     | 0.0003           |
| 0 vs. 250 | 8.44       | 6.99 to 9.89       | Yes          | ****    | <0.0001          |
| 0 vs. 500 | 6.3        | 4.85 to 7.75       | Yes          | ****    | <0.0001          |
